# Supplementary material
Source: publisher site journal article supplement (https://www.spandidos-publications.com/5888/downloadSupplementary)

Figure S1. Representative agarose gel electrophoresis of the combined bisulfite restriction analysis method of Alu repetitive sequence.

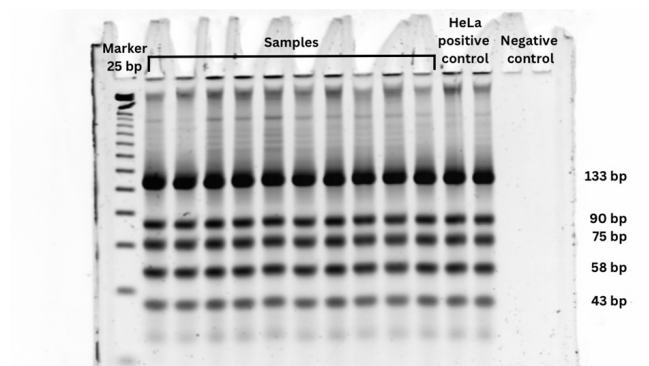

Supplement: Supplementary file 1 [file downloadSupplementary]
